# Supplementary material for: TLR Antagonism by Sparstolonin B Alters Microbial Signature and Modulates Gastrointestinal and Neuronal Inflammation in Gulf War Illness Preclinical Model
Source: MDPI journal article supplement (doi:10.3390/brainsci10080532), 2020-08-08

**Supplementary Fig. 1**

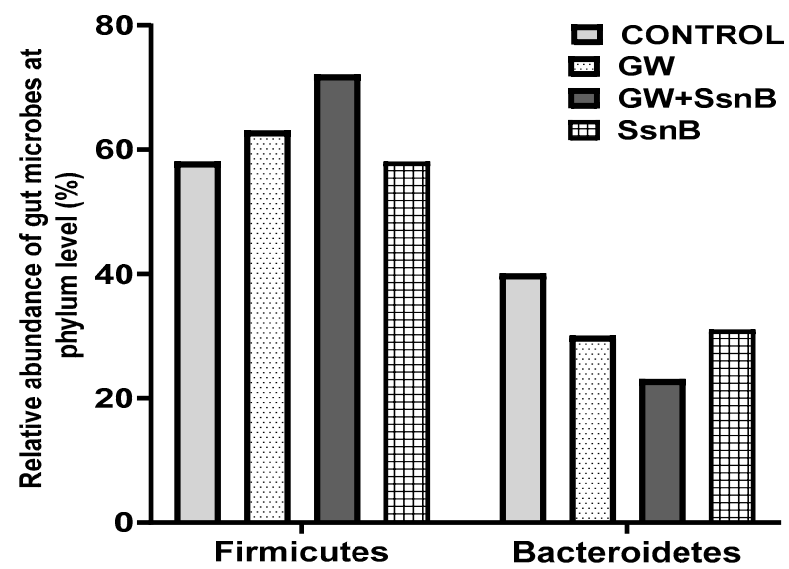

Supplement: s1 [file s1]
